# Supplementary material for: Serotonin syndrome and cannabis: A case report
Source: PubMed Central journal article supplement (PMC10809727; doi:10.1177/10398562231219858), 2023-12-06
Supplement: sj-pdf-1-apy-10.1177_10398562231219858.pdf [file sj-pdf-1-apy-10.1177_10398562231219858.pdf]

**Supplementary Table. Details of each presentation of serotonin syndrome.**

|                                                               |                                                            | <b>Occasion 1</b>                                                                                                                                                                                                                                                                                                       | <b>Occasion 2</b>                                                                                                                                                                                                                                                                                                                                                                               | <b>Occasion 3</b>                                                                                                                                                                                                                                                                                                                                                                  |
|---------------------------------------------------------------|------------------------------------------------------------|-------------------------------------------------------------------------------------------------------------------------------------------------------------------------------------------------------------------------------------------------------------------------------------------------------------------------|-------------------------------------------------------------------------------------------------------------------------------------------------------------------------------------------------------------------------------------------------------------------------------------------------------------------------------------------------------------------------------------------------|------------------------------------------------------------------------------------------------------------------------------------------------------------------------------------------------------------------------------------------------------------------------------------------------------------------------------------------------------------------------------------|
| Timeframe of occasions                                        |                                                            | Reference (0-days)                                                                                                                                                                                                                                                                                                      | 6 days since Occasion 1                                                                                                                                                                                                                                                                                                                                                                         | 18 days since Occasion 1                                                                                                                                                                                                                                                                                                                                                           |
| Prescribed medications                                        |                                                            | Lithium (12-hour level 0.7mmol/L)<br>Fluoxetine 40mg PO MANE <sup>c</sup><br>Melatonin 10mg PO NOCTE                                                                                                                                                                                                                    | Lithium (12-hour level 0.7mmol/L)<br>Fluoxetine 40mg PO MANE<br>Melatonin 10mg PO NOCTE                                                                                                                                                                                                                                                                                                         | Lithium (12-hour level 0.7mmol/L)<br>Fluoxetine 40mg PO MANE<br>Melatonin 10mg PO NOCTE                                                                                                                                                                                                                                                                                            |
| Medication overdose                                           |                                                            | Fluoxetine 560mg PO<br>Lithium (unknown quantity)<br>Timeframe before ED presentation is not established (<8 hours)                                                                                                                                                                                                     | None <sup>d</sup>                                                                                                                                                                                                                                                                                                                                                                               | None                                                                                                                                                                                                                                                                                                                                                                               |
| Cannabis use                                                  |                                                            | Evidenced by positive UDS only                                                                                                                                                                                                                                                                                          | Cannabis oil (THC 28.5mg/mL + cannabidiol<1mg/mL) PO, unknown quantity taken 1-2 hours before ED presentation. Prescription for cannabis oil was dated 9 months earlier.                                                                                                                                                                                                                        | Inhalation via vaporizer (unknown concentration) prior to presentation                                                                                                                                                                                                                                                                                                             |
| Absence of serotonin syndrome features at last medical review |                                                            | Five days prior                                                                                                                                                                                                                                                                                                         | 4 days prior                                                                                                                                                                                                                                                                                                                                                                                    | 2 days prior                                                                                                                                                                                                                                                                                                                                                                       |
| Last witnessed in the absence of serotonin syndrome features  |                                                            | Two hours prior                                                                                                                                                                                                                                                                                                         | <5-hours prior                                                                                                                                                                                                                                                                                                                                                                                  | <3-hours prior                                                                                                                                                                                                                                                                                                                                                                     |
| Documented features at ED presentation                        |                                                            | Ambulance note: 'GCS 10 (E4, V1, M5) and dilated pupils'.<br>On initial Emergency Department review 'significant diaphoresis whole body, HR 130-140bpm sinus tachy, normotensive... pupils 7mm bilaterally and reactive, patient hypertonic with persistent ankle clonus'.<br>Rapid emergence of tonic-clonic seizures. | Ambulance note: 'Acute behavioural disturbance. Restless... Temp 37.4°C. SR 125, systolic BP 150, BGL 6.3'.<br>On initial Emergency Department review: Temp 37.7°C, HR 119, BP 154/95, RR 24, GCS=10 (E4, V1, M5). The following were reported on examination 'restless and agitated', bilateral patellar and ankle hyperreflexia, symmetrical ankle clonus and intermittent right calf clonus. | Ambulance note: 'Unresponsive to verbal stimuli, no consciousness, lethargic'.<br>On initial Emergency Department review: 'Diaphoretic, confused, tachycardic, but responding to verbal stimuli'.<br>On examination: unable to provide any history, examination: diaphoretic (37.5°C), HR135, BP154/95, RR24, nystagmus, pupils 5mm bilaterally, clonus (>30 beats), and rigidity. |
| Hunter criteria <sup>a</sup>                                  | Spontaneous clonus                                         | Yes                                                                                                                                                                                                                                                                                                                     | -                                                                                                                                                                                                                                                                                                                                                                                               | -                                                                                                                                                                                                                                                                                                                                                                                  |
|                                                               | Inducible clonus and Agitation/diaphoresis                 | -                                                                                                                                                                                                                                                                                                                       | Yes                                                                                                                                                                                                                                                                                                                                                                                             | -                                                                                                                                                                                                                                                                                                                                                                                  |
|                                                               | Ocular clonus and Agitation/diaphoresis                    | -                                                                                                                                                                                                                                                                                                                       | -                                                                                                                                                                                                                                                                                                                                                                                               | -                                                                                                                                                                                                                                                                                                                                                                                  |
|                                                               | Inducible clonus/Ocular clonus and Hypertonia+hyperthermia | -                                                                                                                                                                                                                                                                                                                       | -                                                                                                                                                                                                                                                                                                                                                                                               | -                                                                                                                                                                                                                                                                                                                                                                                  |
|                                                               | Tremor and Hyperreflexia                                   | -                                                                                                                                                                                                                                                                                                                       | -                                                                                                                                                                                                                                                                                                                                                                                               | -                                                                                                                                                                                                                                                                                                                                                                                  |
| Severity of serotonin syndrome symptoms <sup>a</sup>          |                                                            | Severe                                                                                                                                                                                                                                                                                                                  | Moderate                                                                                                                                                                                                                                                                                                                                                                                        | Mild                                                                                                                                                                                                                                                                                                                                                                               |
| Timeframe to resolution                                       |                                                            | ~24-hours <sup>e</sup>                                                                                                                                                                                                                                                                                                  | <18 hours                                                                                                                                                                                                                                                                                                                                                                                       | <12 hours                                                                                                                                                                                                                                                                                                                                                                          |
| Hospital-based interventions                                  |                                                            | Intubation > ICU admission, Levitiracetam and midazolam.                                                                                                                                                                                                                                                                | Diazepam + IV antibiotics, supportive care, ICU monitoring                                                                                                                                                                                                                                                                                                                                      | Midazolam, Carbamazepine, telemetry, Supportive care, benzodiazepines                                                                                                                                                                                                                                                                                                              |

<sup>a</sup> See: Wang HZ, Vashistha V, Kaur S, Houchens NW. Serotonin syndrome: preventing, recognizing, and treating it. Cleveland Clinic Journal of Medicine. 2016;83(11):810-817.

<sup>b</sup> Severity categorisation based on the classification outlined in Wang HZ, Vashistha V, Kaur S, Houchens NW. Serotonin syndrome: preventing, recognizing, and treating it. Cleveland Clinic Journal of Medicine. 2016;83(11):810-817.

<sup>c</sup> Commenced at 20mg 28 days prior, increased to 40mg 20 days prior.

<sup>d</sup> The patient did not have access to medications at these times (supported administration)

<sup>e</sup> Timeframe to extubation and waking in ICU
